# Supplementary material for: VUV-vis photoluminescence, X-ray radioluminescence and energy transfer dynamics of Ce3+ and Pr3+ doped LiCaBO3
Source: Royal Society of Chemistry journal article supplement (doi:10.1039/c5tc01834j), 2015-01-01
Supplement: c5tc01834j1.pdf [file c5tc01834j1.pdf]

## Supporting information

### VUV-vis photoluminescence, X-ray radioluminescence and energy transfer dynamics of Ce<sup>3+</sup> and Pr<sup>3+</sup> doped LiCaBO<sub>3</sub>

Weijie Zhou,<sup>a</sup> Dejian Hou,<sup>a</sup> Fengjuan Pan,<sup>a</sup> Bingbing Zhang,<sup>b</sup> Pieter Dorenbos,<sup>c</sup> Yan

Huang,<sup>b</sup> Ye Tao<sup>b</sup> and Hongbin Liang<sup>\*a</sup>

<sup>a</sup> MOE Key Laboratory of Bioinorganic and Synthetic Chemistry, KLGHEI of Environment and Energy Chemistry, School of Chemistry and Chemical Engineering, Sun Yat-sen University, Guangzhou 510275, China

<sup>b</sup> Beijing Synchrotron Radiation Facility, Institute of High Energy Physics, Chinese Academy of Sciences, Beijing 100039, China

<sup>c</sup> Faculty of Applied Sciences, Delft University of Technology, Mekelweg 15, 2629 JB Delft, The Netherlands

---

\* Author to whom correspondence should be addressed; Email:

[cesbin@mail.sysu.edu.cn](mailto:cesbin@mail.sysu.edu.cn)

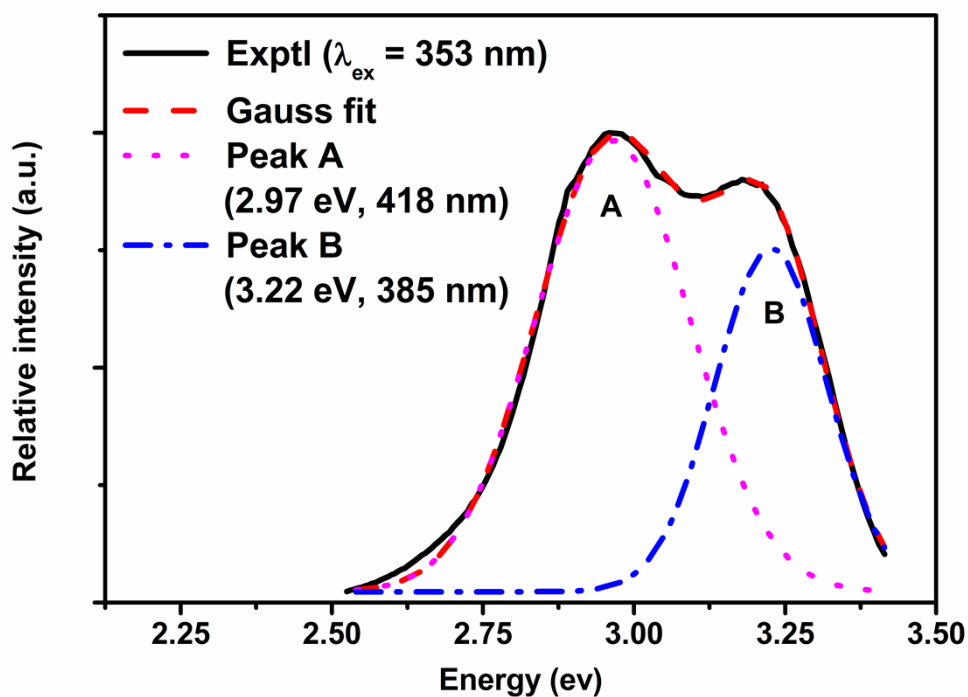

Fig. S1 Fitting results of the emission spectrum ( $\lambda_{\text{ex}} = 353 \text{ nm}$ ) of  $\text{Li}_{1.01}\text{Ca}_{0.98}\text{Ce}_{0.01}\text{BO}_3$  at RT using a sum of two Gauss functions.

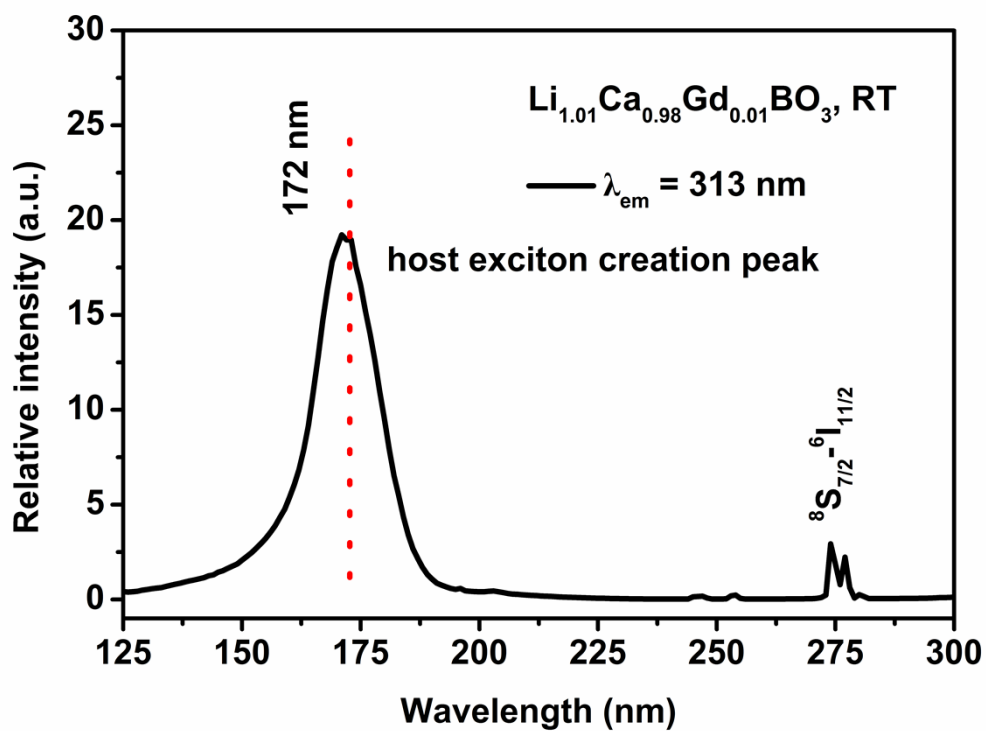

Fig. S2 VUV-UV excitation spectrum ( $\lambda_{\text{em}} = 313 \text{ nm}$ ) of  $\text{Li}_{1.01}\text{Ca}_{0.98}\text{Gd}_{0.01}\text{BO}_3$  at RT.

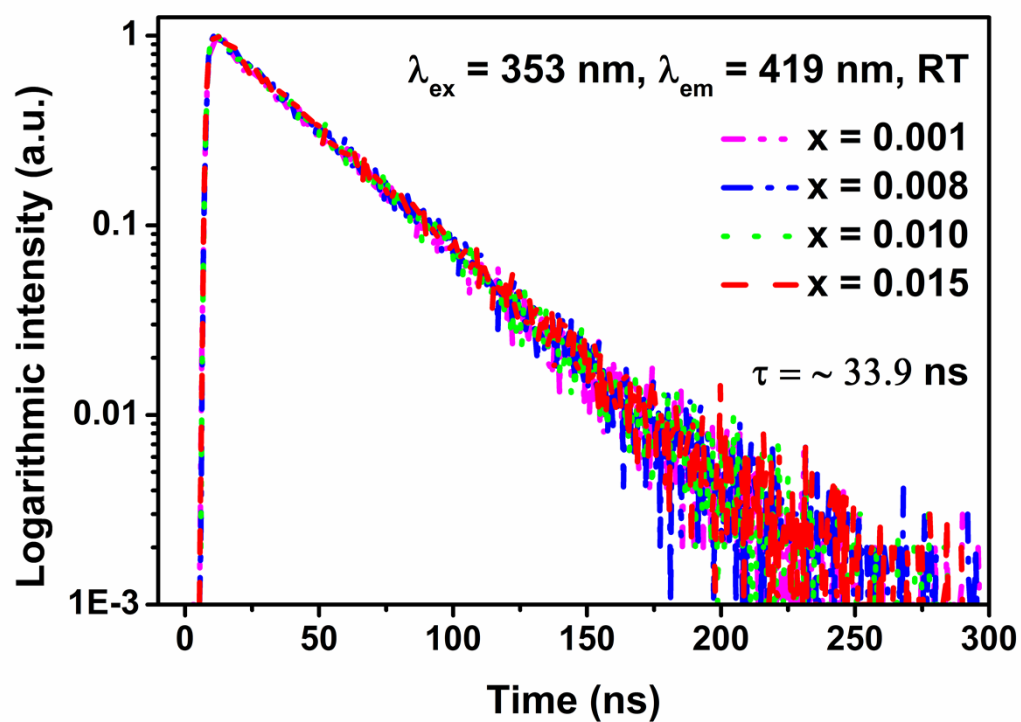

Fig. S3 Normalized luminescence decay curves of  $\text{Li}_{1+x}\text{Ca}_{1-2x}\text{Ce}_x\text{BO}_3$  ( $x = 0.001, 0.008, 0.010, 0.015$ ;  $\lambda_{ex} = 353 \text{ nm}, \lambda_{em} = 419 \text{ nm}$ ) at RT.

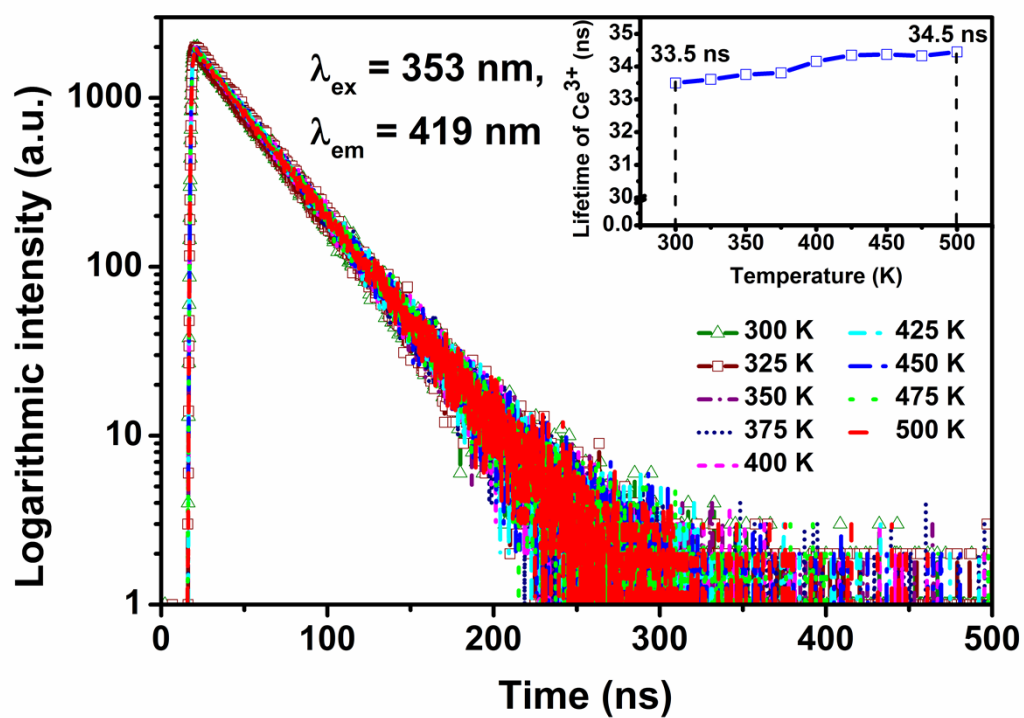

**Fig. S4** Normalized luminescence decay curves of  $\text{Li}_{1.01}\text{Ca}_{0.98}\text{Ce}_{0.01}\text{BO}_3$  ( $\lambda_{\text{ex}} = 353 \text{ nm}$ ,  $\lambda_{\text{em}} = 419 \text{ nm}$ ) at different temperatures. The inset shows the lifetimes of  $\text{Ce}^{3+}$  as a function of temperature.

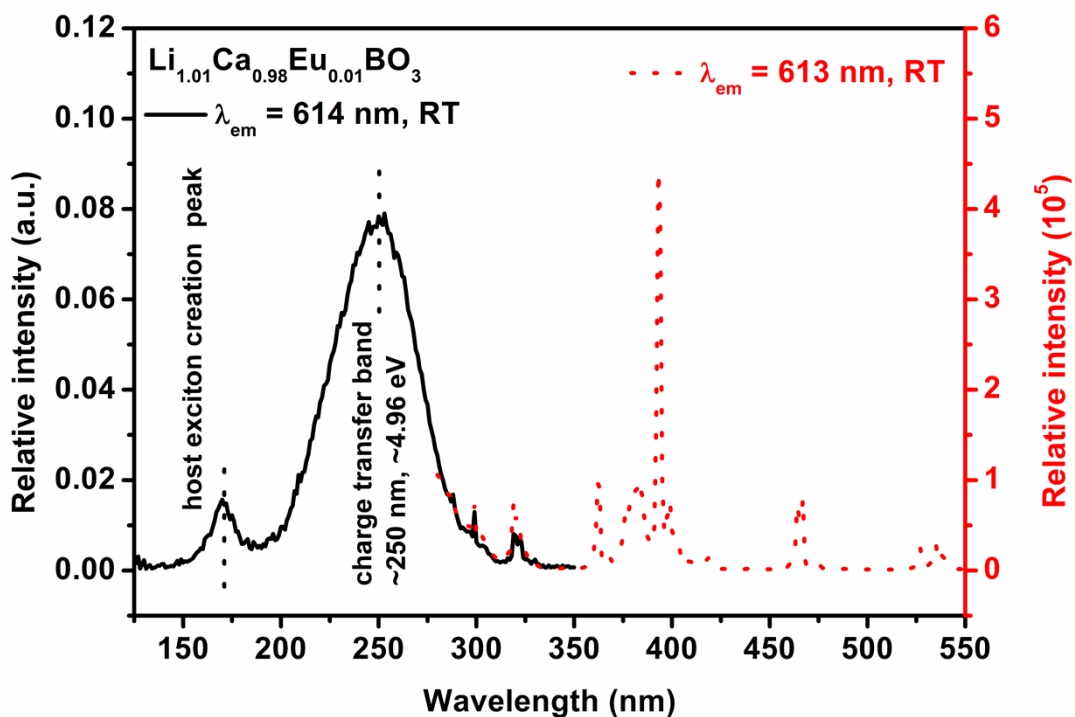

Fig. S5 VUV-UV excitation spectra ( $\lambda_{em} = 614, 613$  nm) of  $\text{Li}_{1.01}\text{Ca}_{0.98}\text{Eu}_{0.01}\text{BO}_3$  at RT.

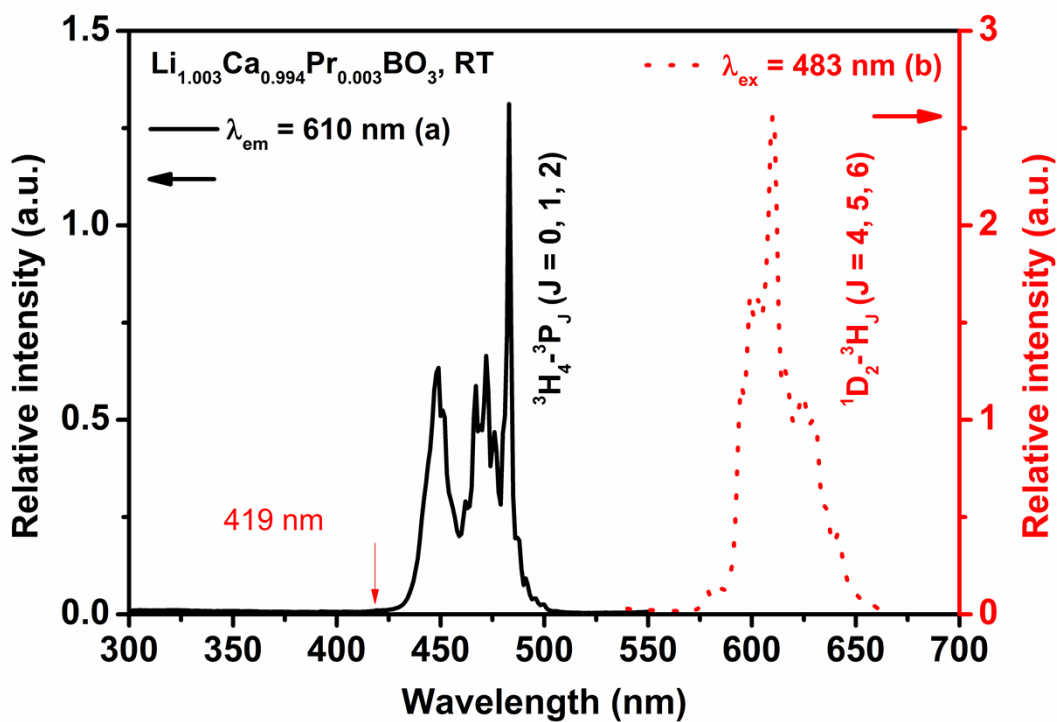

Fig. S6 The 4f-4f excitation spectrum (a,  $\lambda_{em} = 610$  nm) and corresponding emission spectrum (b,  $\lambda_{ex} = 483$  nm) of  $\text{Li}_{1.003}\text{Ca}_{0.994}\text{Pr}_{0.003}\text{BO}_3$  at RT.

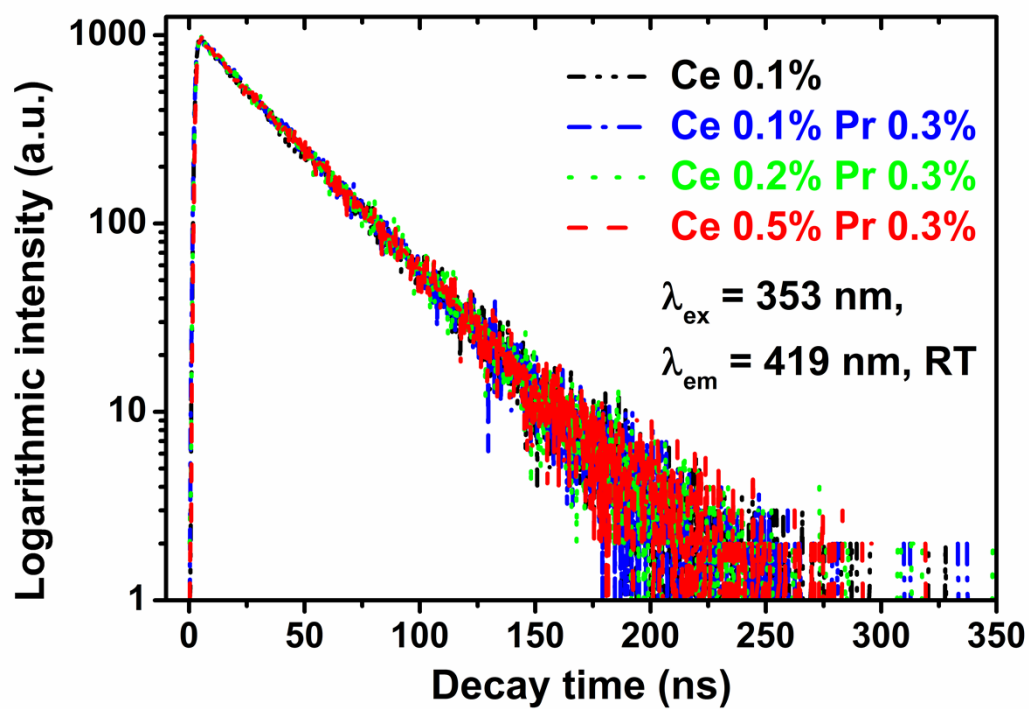

**Fig. S7** Luminescence decay curves of  $\text{Ce}^{3+}$  5d-4f emission at 419 nm for excitation in 5d state of  $\text{Ce}^{3+}$  at 353 nm for  $\text{Li}_{1.001}\text{Ca}_{0.998}\text{Ce}_{0.001}\text{BO}_3$  and  $\text{Li}_{1.003+x}\text{Ca}_{0.994-2x}\text{Ce}_x\text{Pr}_{0.003}\text{BO}_3$  ( $x = 0.001, 0.002, 0.005$ ) at RT.
